# Supplementary material for: Multi-Center Comparison of Two Self-Expanding Transcatheter Heart Valves: A Propensity Matched Analysis
Source: MDPI journal article supplement (doi:10.3390/jcm11144228), 2022-07-21
Supplement: s1 [file s1]

**Supplemental Table S1:** Prosthesis parameters, sizing recommendations and sheath profiles for ACURATE

neo and PORTICO

|                                 | ACURATE neo       |                   |                   |                   | PORTICO           |                   |                   |
|---------------------------------|-------------------|-------------------|-------------------|-------------------|-------------------|-------------------|-------------------|
| Prosthesis parameters           |                   |                   |                   |                   |                   |                   |                   |
| Sizes (mm)                      | S = 23            | M = 25            | L = 27            | 23                | 25                | 27                | 29                |
| Outer diameter<br>(mm)          | 23                | 25                | 27                | 23                | 25                | 27                | 29                |
| Minimum vessel<br>diameter (mm) | ≥ 6.0mm<br>(18 F) | ≥ 6.5mm<br>(19 F) | ≥ 6.5mm<br>(19 F) |
| Recommended annulus ranges      |                   |                   |                   |                   |                   |                   |                   |
| Area (cm²)                      | 3.46-4.15         | 4.15-4.91         | 4.91-5.73         | 2.77–3.46         | 3.38–4.15         | 4.05–4.91         | 4.79–5.73         |
| Perimeter (mm)                  | 66-72             | 72-79             | 79-85             | 60-66             | 66-73             | 72-79             | 79-85             |
| Diameter (mm)                   | 21.1-22.9         | 22.9-25.0         | 25.0-26.9         | 18.9-22.1         | 22.1-23.1         | 22.9-25.0         | 25.0-26.9         |

**Supplemental Table S2:** Procedural characteristics and in-hospital complications of patients treated with PORTICO and of the entire and the matched population treated with ACURATE neo

|                       |                      | Entire Population   |         |
|-----------------------|----------------------|---------------------|---------|
|                       | PORTICO              | ACURATE neo         | p Value |
|                       | (n = 344)            | (n = 1247)          |         |
| Procedural data       |                      |                     |         |
| Conscious sedation    | 308 (89.5%)          | 1110 (89.0%)        | 0.859   |
| THV Size              |                      |                     | <0.001  |
| 23                    | 6 (1.7%)             | 277 (22.2%)         |         |
| 25                    | 93 (27.0%)           | 531 (42.6%)         |         |
| 27                    | 123 (35.8%)          | 438 (35.2%)         |         |
| 29                    | 122 (35.5%)          | 0 (0.0%)            |         |
| Predilatation         | 275 (79.9%)          | 876 (70.3%)         | 0.001   |
| Postdilatation        | 64 (18.6%)           | 384 (30.8%)         | <0.001  |
| Cerebral protection   | 2 (0.6%)             | 28 (2.2%)           | 0.074   |
| Procedural time (min) | 52.0 (40.0–69.0)     | 50.0 (34.0–67.0)    | 0.004   |
| Contrast (ml)         | 120.0 (100.0–160.0)  | 100.0 (80.0–120.0)  | <0.001  |
| Fluoroscopy dose (Gy) | 1466.5 (29.1–3463.8) | 133.1 (18.8–2767.5) | <0.001  |
| Fluoroscopy time (s)  | 12.5 (9.2–17.1)      | 9.7 (7.3–13.6)      | <0.001  |

|                                                                                                                                                           | Entire Population |                  |         |
|-----------------------------------------------------------------------------------------------------------------------------------------------------------|-------------------|------------------|---------|
|                                                                                                                                                           | PORTICO           | ACURATE neo      | p Value |
|                                                                                                                                                           | (n = 344)         | (n = 1247)       |         |
| Echocardiographic characteristics                                                                                                                         |                   |                  |         |
| Postprocedural mean gradient (mmHg)                                                                                                                       | 8.0 (6.0–10.0)    | 8.0 (6.0–11.0)   | 0.443   |
| Postprocedural max gradient (mmHg)                                                                                                                        | 13.0 (10.0–18.0)  | 14.0 (10.8–19.2) | 0.425   |
| Clinical events                                                                                                                                           |                   |                  |         |
| Major stroke /minor stroke/ TIA                                                                                                                           | 13 (3.8%)         | 35 (2.8%)        | 0.446   |
| Major vascular complications                                                                                                                              | 9 (4.5%)          | 42 (6.8%)        | 0.334   |
| Life-threatening bleeding (VARC)                                                                                                                          | 2 (1.0%)          | 7 (1.1%)         | 1.000   |
| Renal failure (AKIN 2/3)                                                                                                                                  | 12 (3.5%)         | 35 (2.8%)        | 0.636   |
| Coronary artery obstruction with PCI                                                                                                                      | 0 (0.0%)          | 7 (1.1%)         | 0.205   |
| Myocardial infarction                                                                                                                                     | 6 (3.0%)          | 22 (3.5%)        | 0.898   |
| Permanent pacemaker implantation <sup>1</sup>                                                                                                             | 52 (18.7%)        | 126 (11.5%)      | 0.002   |
| Days in hospital                                                                                                                                          | 7.0 (6.0–10.0)    | 8.0 (6.0–10.0)   | 0.817   |
| Days on intensive care unit                                                                                                                               | 2.0 (1.0–3.0)     | 2.0 (1.0–3.0)    | 0.016   |
| In-hospital mortality                                                                                                                                     | 10 (2.9%)         | 22 (1.8%)        | 0.264   |
| Values are mean SD, n (%), or median (interquartile range). <sup>1</sup> Excluding patients with pacemaker at baseline (n = 213 in unmatched population). |                   |                  |         |

|                                                                                                                  | Entire Population    |                           |
|------------------------------------------------------------------------------------------------------------------|----------------------|---------------------------|
|                                                                                                                  | PORTICO<br>(n = 344) | ACURATE neo<br>(n = 1247) |
| p Value                                                                                                          |                      |                           |
| VARC = Valve Academic Research Consortium, AKIN = Acute Kidney Injury Network, TIA = transitory ischemic attack. |                      |                           |

**Supplemental Table S3:** Device failure of patients treated with PORTICO and ACURATE neo of the entire population

|                                                                                                                                                                                                                                                                                | PORTICO<br>(n = 344) | ACURATE neo<br>(n = 1247) | p Value |
|--------------------------------------------------------------------------------------------------------------------------------------------------------------------------------------------------------------------------------------------------------------------------------|----------------------|---------------------------|---------|
| Device failure <sup>1</sup>                                                                                                                                                                                                                                                    | 26 (7.6%)            | 88 (7.1%)                 | 0.841   |
| Procedural related death                                                                                                                                                                                                                                                       | 1 (0.5%)             | 6 (1.0%)                  | 1.000   |
| Significant PVL (> Grade II)                                                                                                                                                                                                                                                   | 12 (3.5%)            | 42 (3.4%)                 | 1.000   |
| Elevated gradient (>20mmHg)                                                                                                                                                                                                                                                    | 4 (1.2%)             | 24 (2.0%)                 | 0.475   |
| Multiple valves                                                                                                                                                                                                                                                                | 10 (2.9%)            | 19 (1.5%)                 | 0.141   |
| Conversion to sternotomy                                                                                                                                                                                                                                                       | 5 (1.5%)             | 7 (0.6%)                  | 0.148   |
| Values are mean SD, n (%).<br><br><sup>1</sup> Prothesis mismatch, mean aortic gradient > 20 mmHg or peak velocity > 3 m/s, moderate or severe prosthetic valve aortic regurgitation of the first implanted valve, multiple events possible.<br><br>PVL = paravalvular leakage |                      |                           |         |

Table S4: Reasons for Conversion (Entire population)

|                                           | PORTICO<br><i>(n = 5)</i> | ACURATE neo<br><i>(n = 7)</i> | p Value |
|-------------------------------------------|---------------------------|-------------------------------|---------|
| Reasons for conversion                    |                           |                               |         |
| Coronary impairment                       | 0 (0.0%)                  | 1 (14.3%)                     |         |
| Embolisation                              | 3 (60%)                   | 2 (28.6%)                     |         |
| Pericardial effusion                      | 1 (20%)                   | 4 (57.1%)                     |         |
| Severe mitral regurgitation (due to wire) | 1 (20%)                   | 0 (0.0%)                      |         |
| Values are n (%).                         |                           |                               |         |
